# Supplementary material
Source: PubMed Central journal article supplement (PMC2265184)

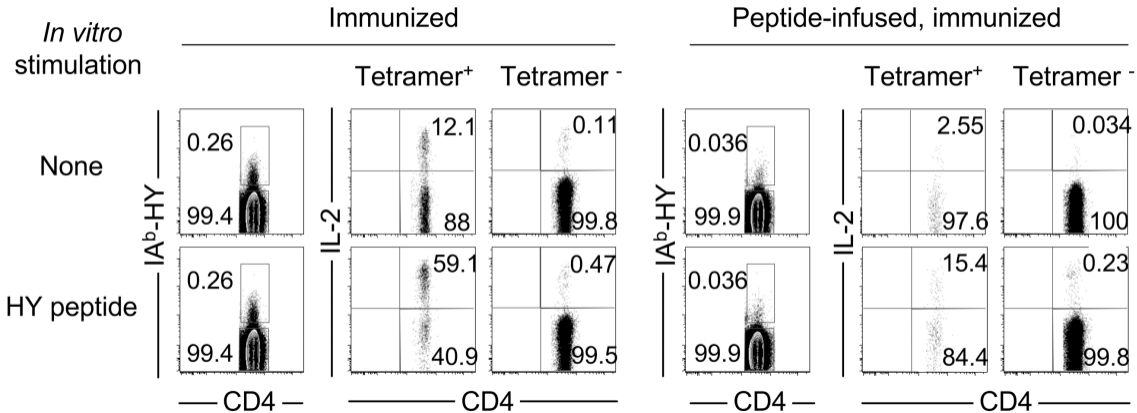

Supplement: pnas_0800149105_1.pdf [file pnas_0800149105_1.pdf]

**A**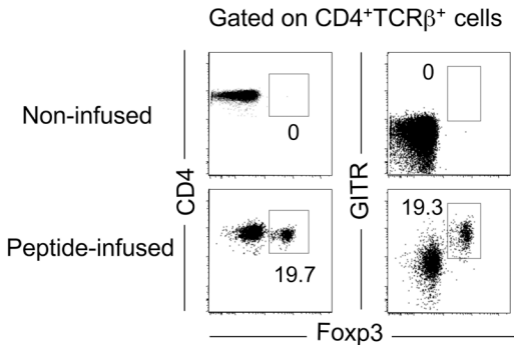**B**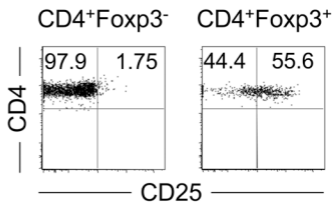**C**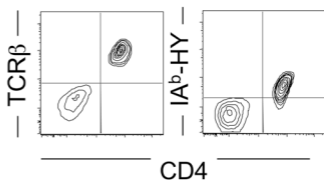

Supplement: pnas_0800149105_2.pdf [file pnas_0800149105_2.pdf]

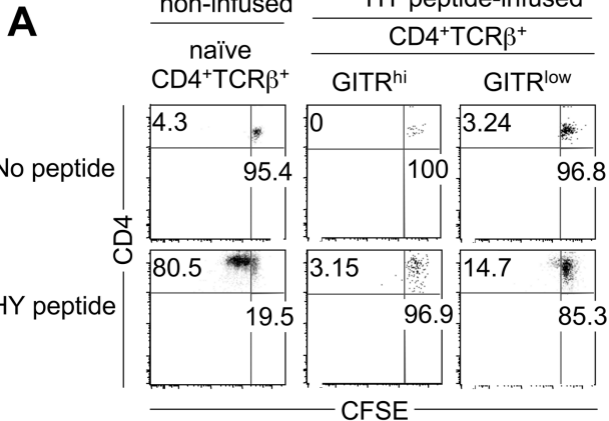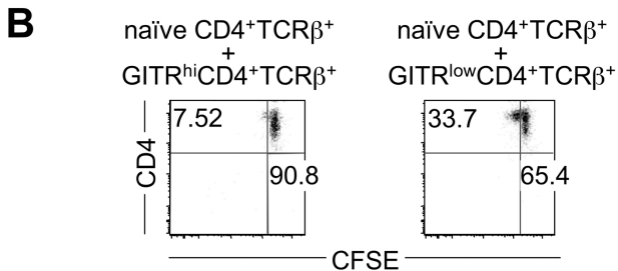

Supplement: pnas_0800149105_3.pdf [file pnas_0800149105_3.pdf]

## Spleen

## Graft-draining LN

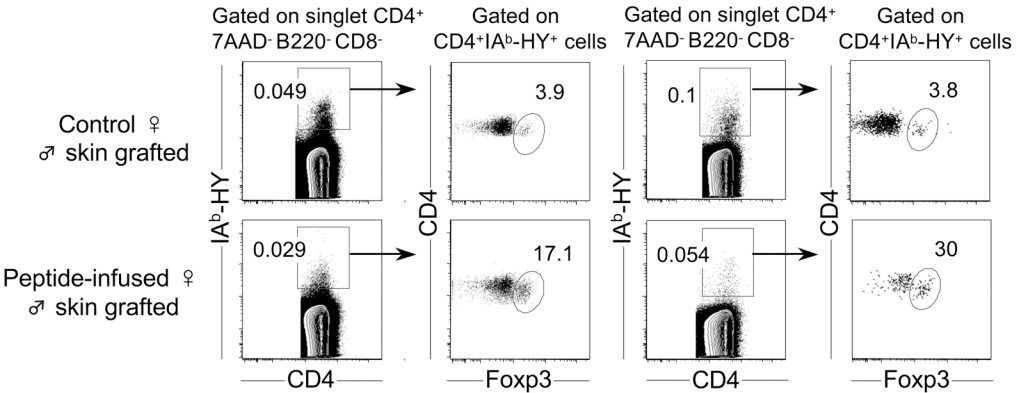

Supplement: pnas_0800149105_4.pdf [file pnas_0800149105_4.pdf]

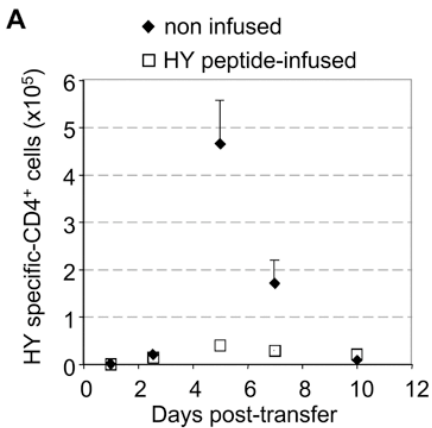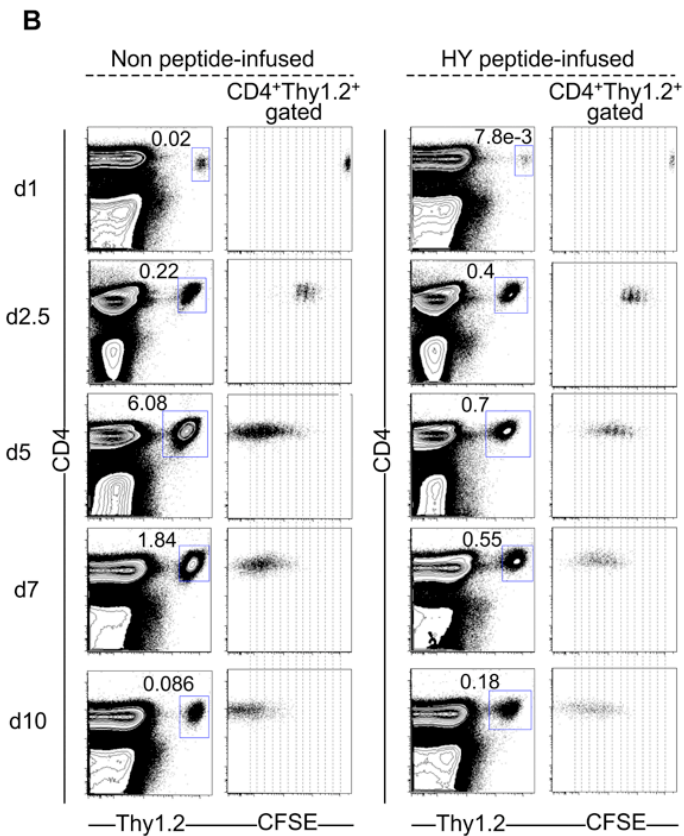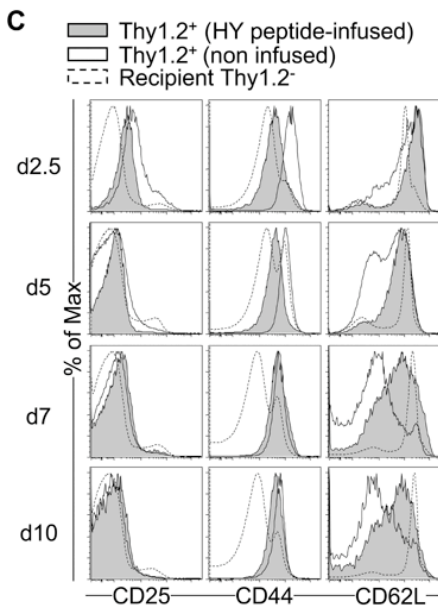

Supplement: pnas_0800149105_5.pdf [file pnas_0800149105_5.pdf]
